# Supplementary material for: Prominent nonequilibrium effects beyond the standard first-principles approach in nanoscale electronic devices
Source: Royal Society of Chemistry journal article supplement (doi:10.1039/d1nh00293g), 2021-01-01
Supplement: d1nh00293g1.pdf [file d1nh00293g1.pdf]

## Supplementary information

### Prominent nonequilibrium effects beyond the standard density functional theory approach in molecular electronic devices

Zhuoling Jiang<sup>1,†</sup>, Kah-Meng Yam<sup>1,2,†</sup>, Na Guo<sup>1</sup>, Lishu Zhang<sup>1,3</sup>, Lei Shen<sup>4</sup>, Chun Zhang<sup>1,2,\*</sup>

<sup>1</sup> Department of Physics and Centre for 2D Advanced Materials, National University of Singapore, 2 Science Drive 3, Singapore 117551.

<sup>2</sup> Department of Chemistry, National University of Singapore, 3 Science Drive 3, Singapore 117543.

<sup>3</sup> Key Laboratory for Liquid-Solid Structural Evolution and Processing of Materials, Ministry of Education, Shandong University, Jinan 250061, China

<sup>4</sup> Department of Mechanical Engineering and Engineering Science, National University of Singapore, Singapore 117542.

**Table 1.** The zero-bias conductance (in unit of  $0.01G_0$ ) of  $Si_n$ -S-M ( $n=3,6,7$ ;  $M=Ag,Au$ )

calculated by TranSIESTA and SMEAGOL.

| Package \ n |      | n=3 ( $Si_3$ ) | n=6 ( $Si_6$ ) | n=7 ( $Si_7$ ) |
|-------------|------|----------------|----------------|----------------|
| TranSIESTA  | M=Ag | 4.55           | 2.15           | 1.61           |
|             | M=Au | 5.40           | 2.97           | 1.89           |
| SMEAGOL     | M=Ag | 4.50           | 2.14           | 1.61           |
|             | M=Au | 5.45           | 2.99           | 1.85           |

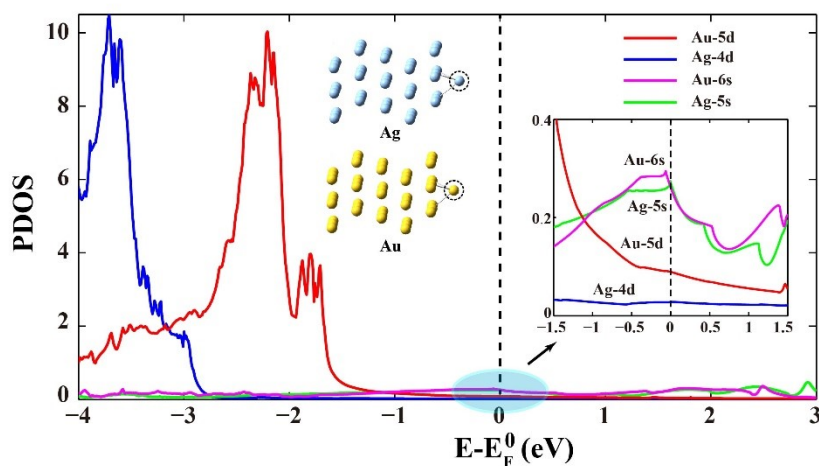

**Figure 1.** The local density of states projected onto the 6s and 5d orbitals of Au atom and the 5s and 4d orbitals of Ag atom that form bonds with silanes. Inset: Enlarged PDOS near the Fermi energy.

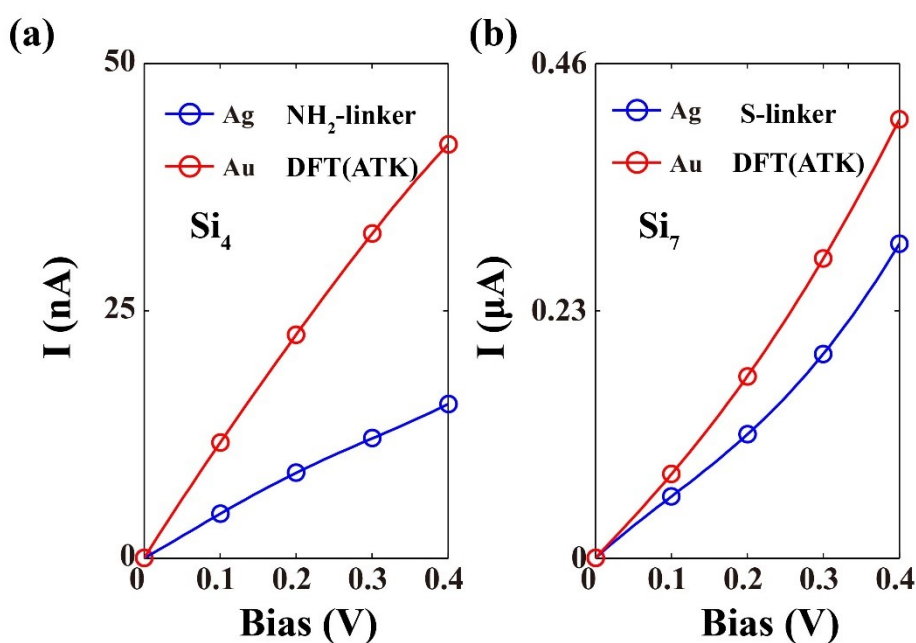

**Figure 2.** I-V curves calculated from ATK for (a)  $\text{Si}_4\text{-NH}_2\text{-M}$  (M=Au or Ag) and (b)  $\text{Si}_7\text{-S-M}$  (M=Au or Ag). In both cases, Au contact provide much higher conductivity than Ag.

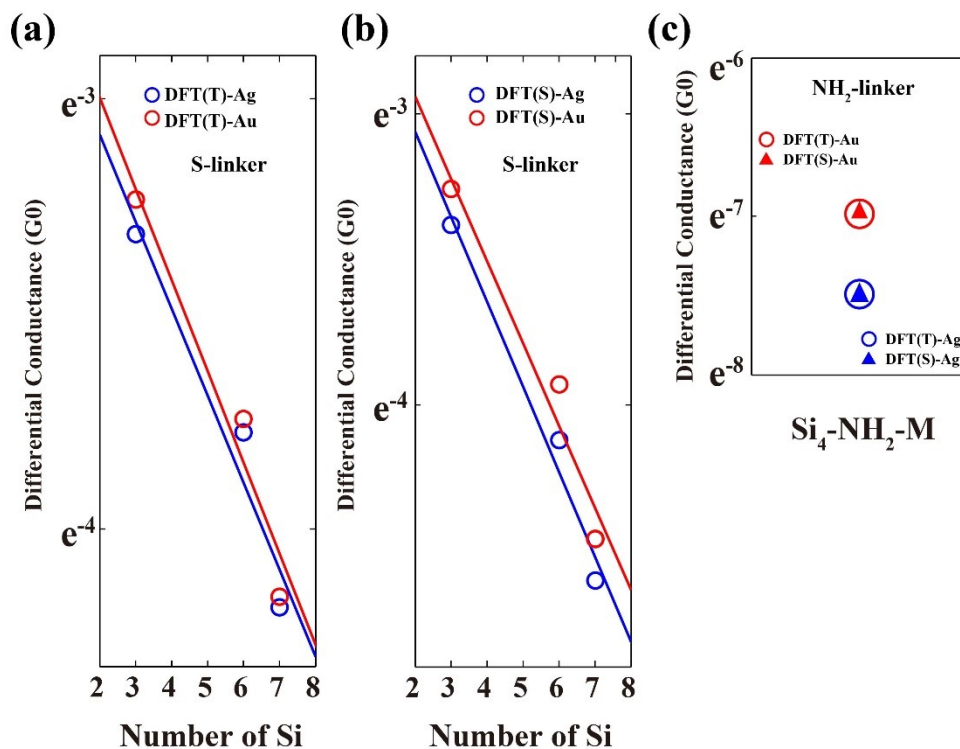

**Figure 3.** The differential conductance of the thiol-terminated silanes junctions  $\text{Si}_n\text{-S-M}$  (M=Au or Ag) at 0.2V calculated from (a) TranSIESTA ( DFT(T)) and (b) SMEAGOL (DFT(S)). The solid lines show the linear fits to the data. (c) The differential conductance at 0.2 V for  $\text{Si}_4\text{-NH}_2\text{-M}$  (M=Au or Ag) from both DFT(T) and DFT(S). For  $\text{NH}_2$  linker, they agree with each other (also agree with SS-DFT) remarkably well.

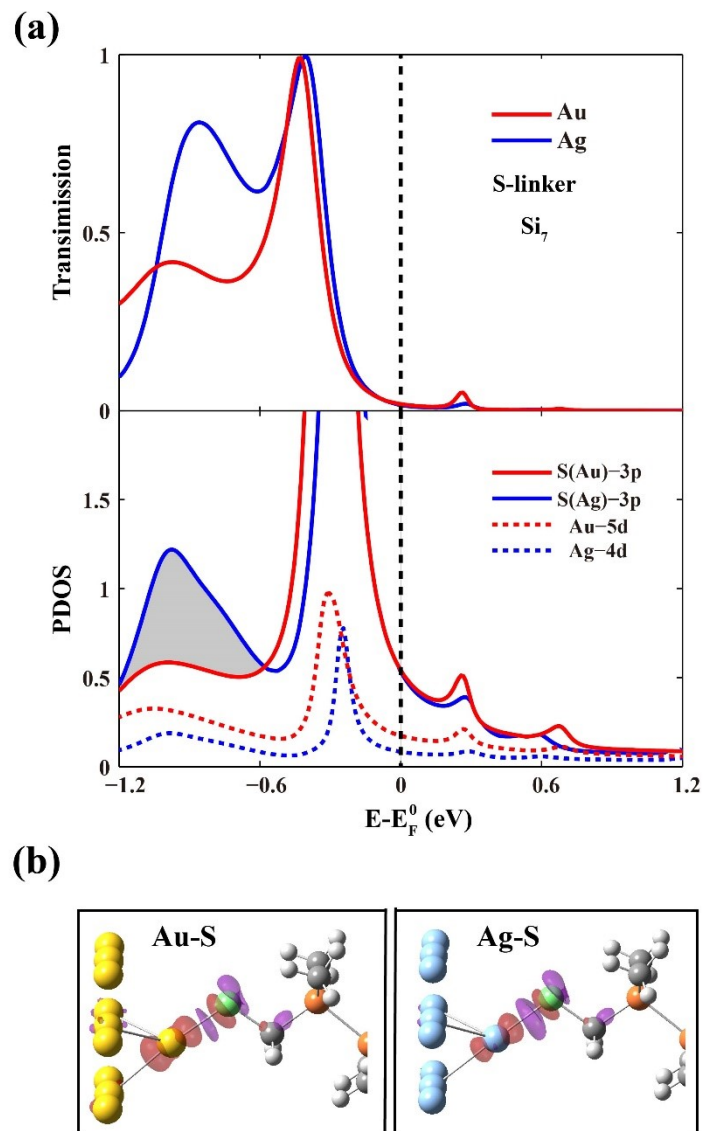

**Figure 4. (a)** The zero-bias transmission spectra of junctions Si<sub>7</sub>-S-M (M=Au or Ag) (Upper panel) and the projected density of states (PDOS) of p orbital of the S atom and d orbital of Au/Ag atom binding with S (lower panel). S(Au or Ag) denotes the S atom binding with Au or Ag electrode. **(b)** The iso-surface (0.004e) of the density redistribution due to the metal-S bonds in the Si<sub>7</sub>-S-M junctions. The purple (red) indicates the accumulation (depletion) of electrons. We can see clearly that the S atom gains more electrons from Ag than from Au.

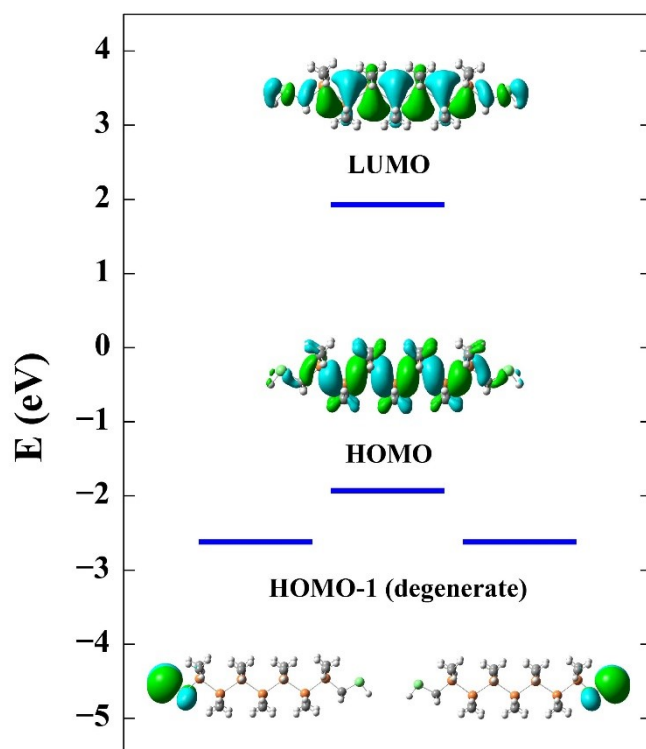

**Figure 5.** Frontier molecular orbitals of the thiol-terminated Silanes  $\text{Si}_7\text{-SH}$ . Note that two HOMO-1 orbitals are degenerate.

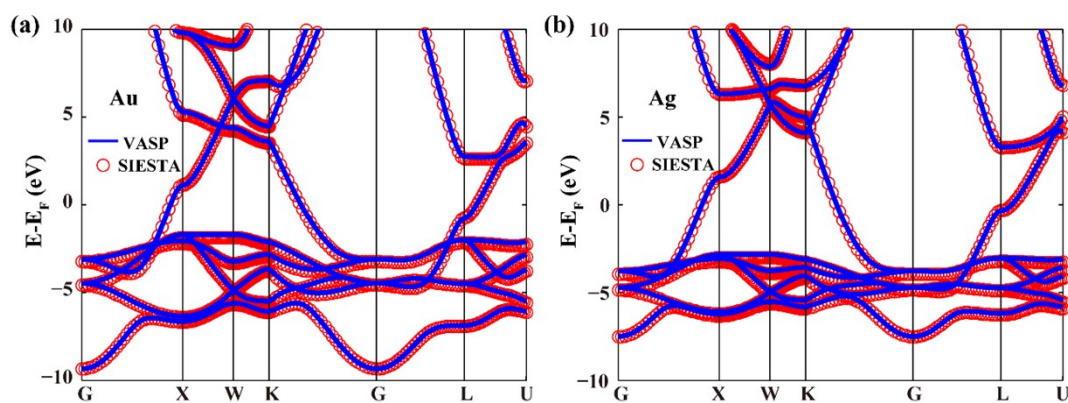

**Figure 6.** The band structures of bulk (a) Au and (b) Ag computed by VASP (in blue solid lines) and SIESTA (with red open circles) respectively in the first Brillouin zone. In both plots, the Fermi level was set to 0.0 eV.

## Supplementary information

---

Table 2. HOMO-LUMO gaps for amine-terminated and thiol-terminated silanes from SIESTA and VASP (in unit of eV). Two packages agree with each other well.

| <div>Molecule</div> <div>Package</div> | Si <sub>4</sub> -NH <sub>2</sub> | Si <sub>3</sub> -SH | Si <sub>6</sub> -SH | Si <sub>7</sub> -SH |
|----------------------------------------|----------------------------------|---------------------|---------------------|---------------------|
| SIESTA                                 | 4.12                             | 4.58                | 4.07                | 3.86                |
| VASP                                   | 3.98                             | 4.41                | 3.90                | 3.68                |
